# Supplementary material
Source: PubMed Central journal article supplement (PMC4761517)
Supplement: NIHMS750395-supplement-Revised_Supplemental_Figures.pdf [file NIHMS750395-supplement-Revised_Supplemental_Figures.pdf]

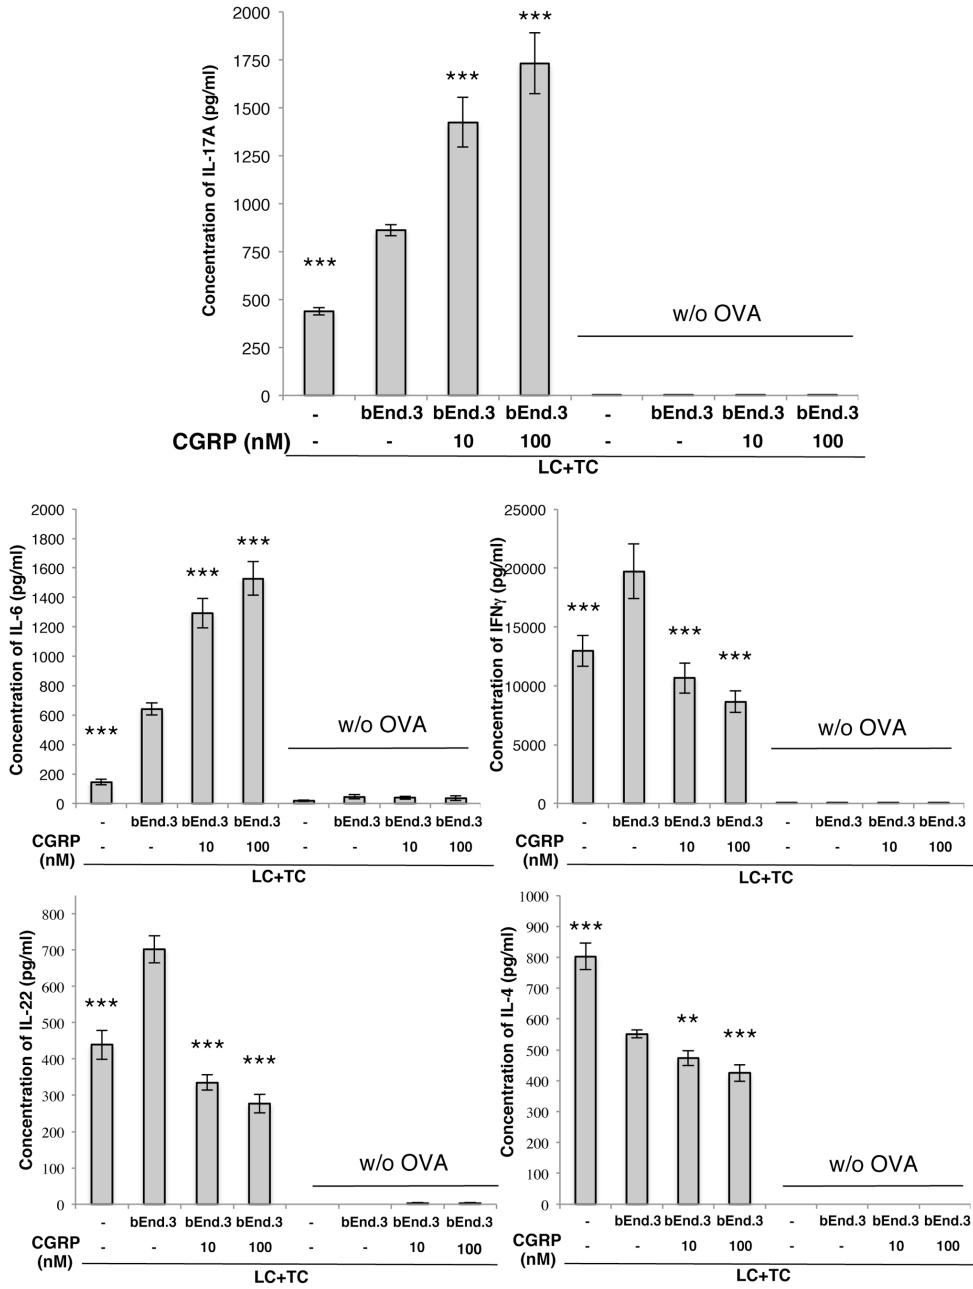

**SUPPLEMENTAL FIGURE 1.** CGRP pre-treatment of bEnd.3 cells biases LC Ag presentation to T cells towards an enhanced IL-17A and IL-6 response with a reduced IFN $\gamma$ , IL-22 and IL-4 response. Medium- or CGRP-treated bEnd.3 cells were added to cultures of LC, T cells (from DO11.10 Tg mice) and cOVA<sub>323-339</sub>. After 48 hours, supernatants were assessed for cytokine content. Addition of medium-treated bEnd.3 cells significantly enhanced IL-17A, IL-6, IFN $\gamma$  and IL-22 accompanied by a small but significant decrease in IL-4 production occurred. Addition of CGRP-treated bEnd.3 cells induced a much larger increase in IL-17A and IL-6 production but eliminated the increased production of IFN $\gamma$  and IL-22 with a further small but significant reduction in IL-4 production compared to that seen in wells with addition of medium-treated bEnd.3 cells. n=4 experiments, all groups. \*p < 0.05, \*\*p < 0.01, \*\*\*p < 0.001.

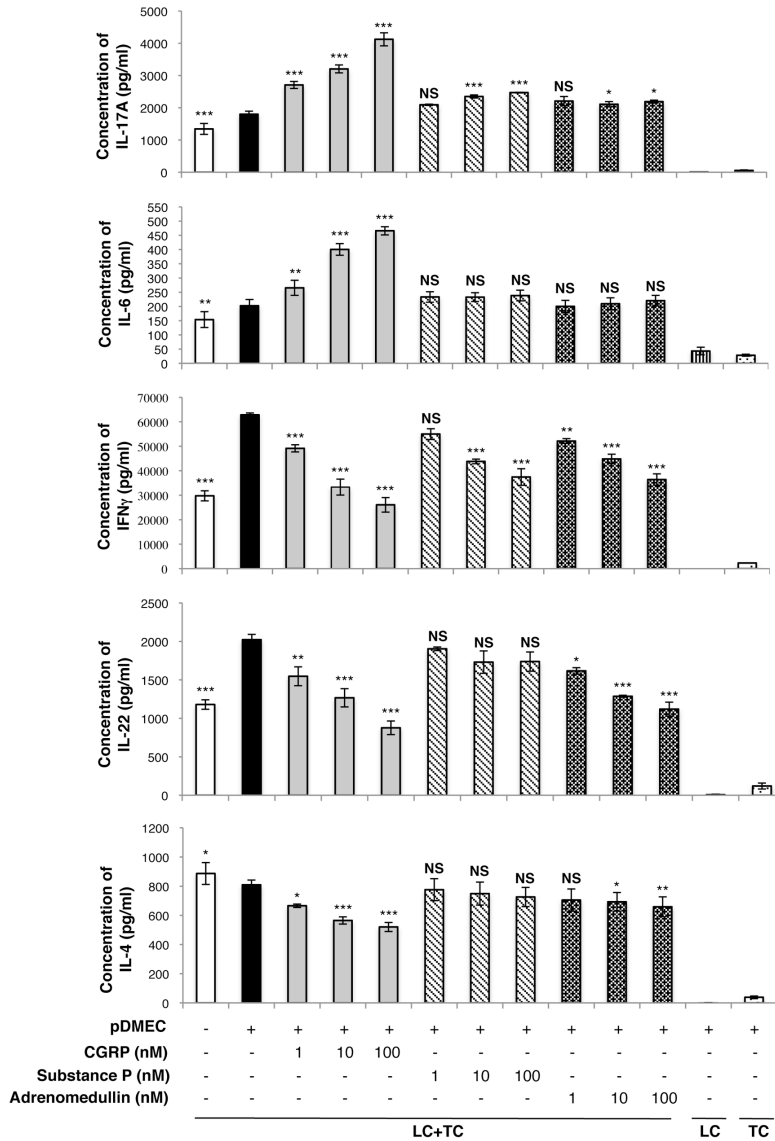

**SUPPLEMENTAL FIGURE 2.** Pre-treatment of pDMECs with SP or ADM biases LC Ag presentation to T cells with a different pattern of responses compared to CGRP-pre-treated pDMECs. Medium-, CGRP-, SP- or ADM-treated pDMECs were added to cultures of LC, T cells (from DO11.10 Tg mice) and cOVA<sub>323-339</sub>. After 48 hours, supernatants were assessed for cytokine content. Compared to wells containing medium-treated pDMECs, CGRP treatment resulted in a significant increase in IL-17A and IL-6 production with significantly decreased production of IFN $\gamma$ , IL-22 and IL-4. SP treatment yielded a tiny but significant increase in IL-17A production, no change in IL-6, IL-22 or IL-4 production and a small but significant decrease in IFN $\gamma$  production. ADM treatment yielded a tiny but significant increase in IL-17A production, no change in IL-6 production, small but significant decreases in IFN $\gamma$  and IL-22 production and a very small but significant reduction in IL-4 production. n=3 experiments, all groups. \*p < 0.05, \*\*p < 0.01, \*\*\*p < 0.001.

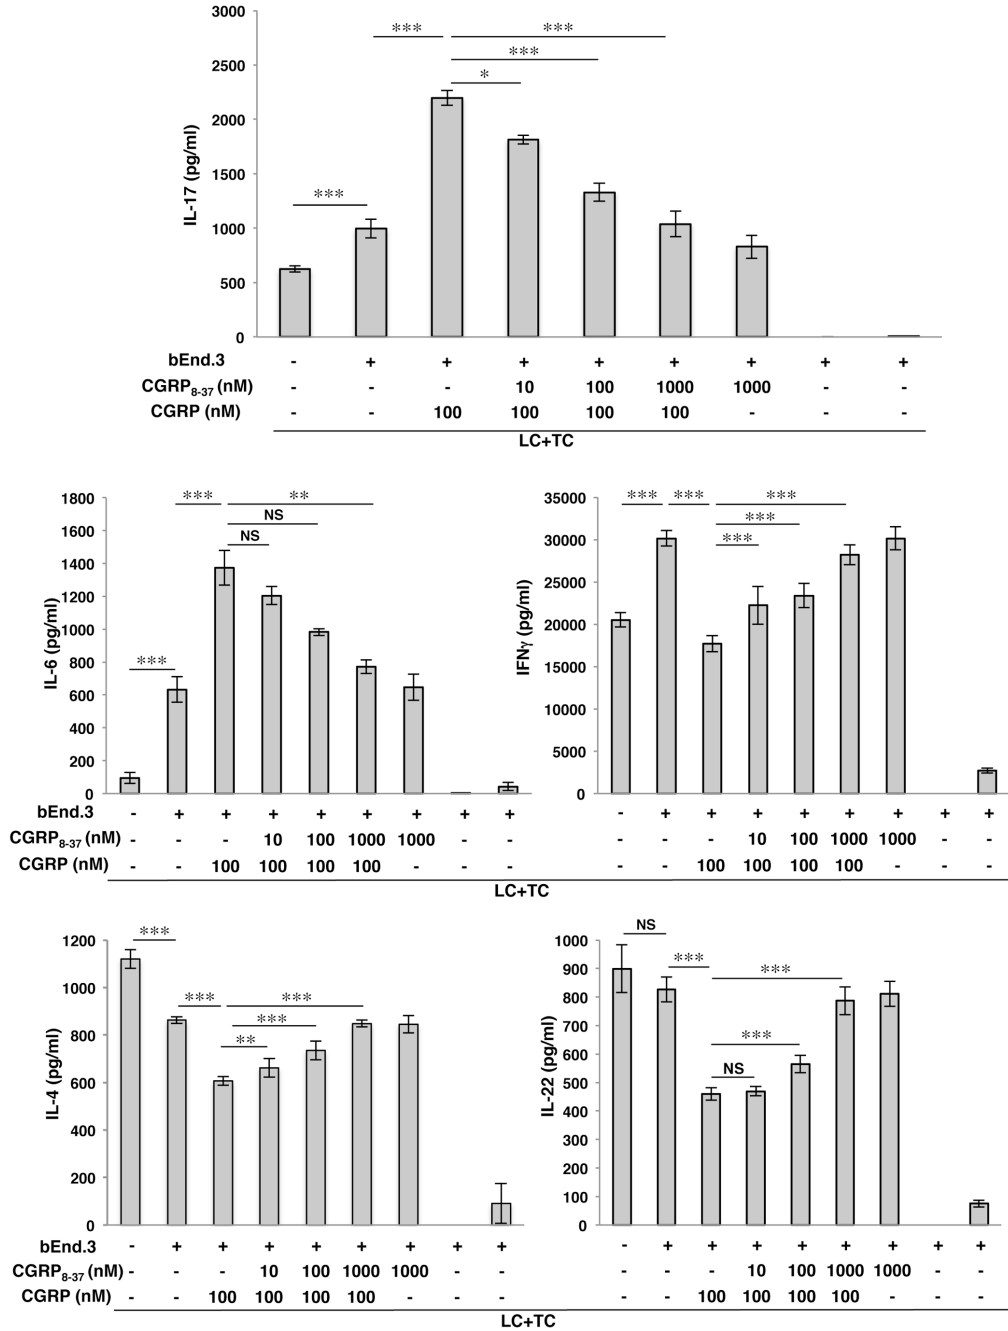

**SUPPLEMENTAL FIGURE 3.** The effects of CGRP pre-treatment of bEnd.3 cells on LC Ag presentation to T cells can be blocked with CGRP<sub>8-37</sub>. bEnd.3 cells were treated with graded concentrations of CGRP<sub>8-37</sub> or medium alone during exposure to CGRP followed by washing and addition to cultures of LCs, T cells (from DO11.10 Tg mice) and cOVA<sub>323-339</sub>. After 48 hours, supernatants were assessed for cytokine content. The effects of CGRP on production of IL-17A, IL-6, IFN $\gamma$ , IL-4 and IL-22 were all significantly inhibited by CGRP<sub>8-37</sub> in a dose-dependent manner. n=3 experiments, all groups. \*p < 0.05, \*\*p < 0.01, \*\*\*p < 0.001.

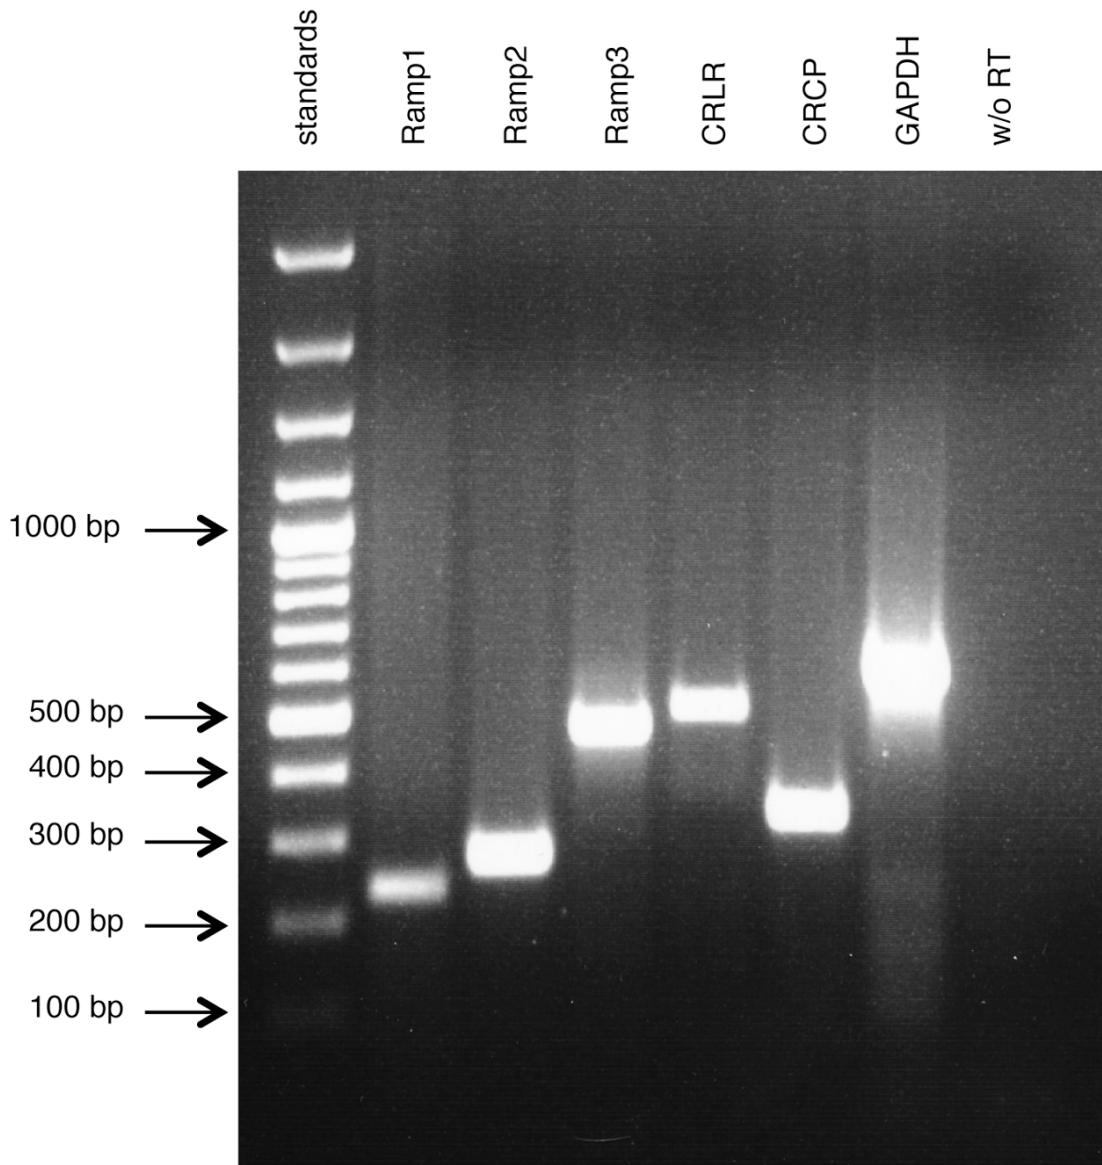

**SUPPLEMENTAL FIGURE 4.** Total RNA was extracted from pDMECs of BALB/c mice and RT-PCR for RAMP1, RAMP2, RAMP3, CRLR and CRCP performed. RAMP1, RAMP2, RAMP3, CRLR and CRCP are all expressed as indicated by the presence of a PCR product of the predicted molecular weight.
